# Supplementary material for: N-doped carbon coated hollow NixCo9−xS8urchins for a high performance supercapacitor
Source: Royal Society of Chemistry journal article supplement (doi:10.1039/c4nr06286h), 2015-01-01
Supplement: c4nr06286h1.pdf [file c4nr06286h1.pdf]

## Supporting Information

### N-doped carbon coated hollow $\text{Ni}_x\text{Co}_{9-x}\text{S}_8$ urchins for high-performance supercapacitors

Yufei Zhang <sup>a,b</sup>, Chencheng Sun<sup>b</sup>, Haiquan Su,<sup>a</sup> Wei Huang<sup>b,c\*</sup>, Xiaochen Dong<sup>b,c\*</sup>

<sup>a</sup>School of Chemistry and Chemical Engineering, Inner Mongolia University, Hohhot 010021, Inner Mongolia, China

<sup>b</sup>Key Laboratory of Flexible Electronics (KLOFE) & Institute of Advanced Materials (IAM), National Jiangsu Synergistic Innovation Center for Advanced Materials (SICAM), Nanjing Tech University (NanjingTech), 30 South Puzhu Road, Nanjing 211816, China.

<sup>c</sup>Key Laboratory for Organic Electronics and Information Displays & Institute of Advanced Materials(IAM), Nanjing University of Posts & Telecommunications, 9 Wenyuan Road, Nanjing 210023, China

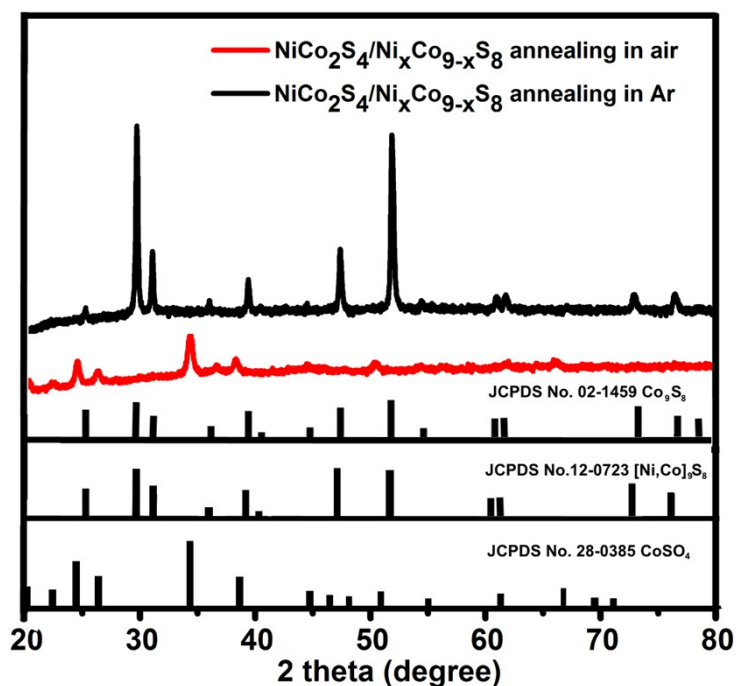

**Figure S1** XRD patterns of  $\text{NiCo}_2\text{S}_4/\text{Ni}_x\text{Co}_{9-x}\text{S}_8$  after annealing in air and Ar.

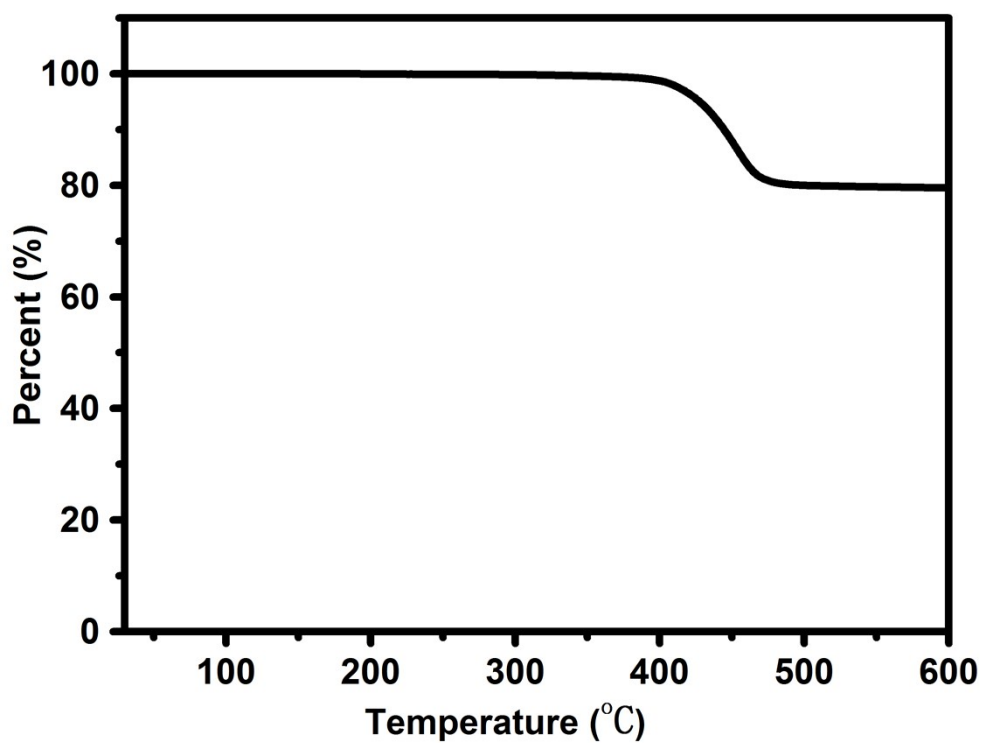

Figure S2 TGA curve of  $\text{Ni}_x\text{Co}_{9-x}\text{S}_8@\text{C}$ .

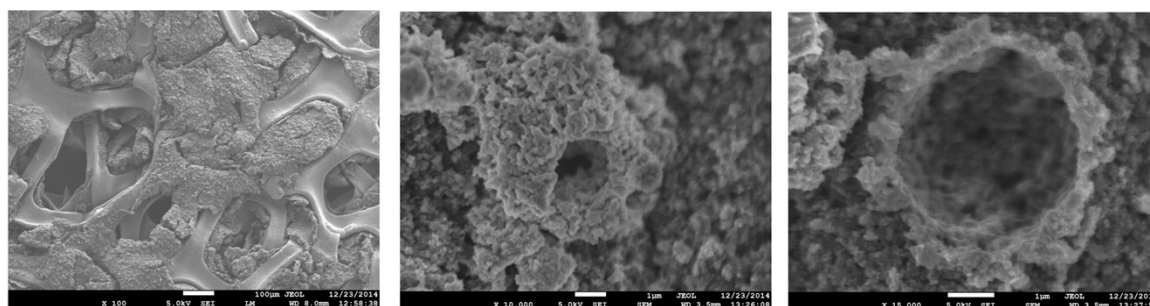

Figure S3 SEM images  $\text{Ni}_x\text{Co}_{9-x}\text{S}_8@\text{C}$  pasted on Ni foam after 2000 cycles measured at different magnification.
